# Supplementary material
Source: PubMed Central journal article supplement (PMC8260439)
Supplement: NIHMS1687770-supplement-1.pdf [file NIHMS1687770-supplement-1.pdf]

## **Geographic Variation in Cardiovascular Health Among American Adults**

---

### **Supplementary Methods**

**Supplementary Table 1.** Calculation of Cardiovascular Health Index

**Supplementary Table 2.** Baseline Characteristics of the BRFSS Study Population: 2011-2017

**Supplementary Table 3.** Relationship of Cardiovascular Health Index and Cardiovascular Mortality: Stratified by Region, Sex, and Race

**Supplementary Figure 1.** Trends in Diabetes, Hypertension, Hypercholesterolemia, and Obesity

**Supplementary Figure 2.** Trends in Smoking, Physical Inactivity, and Poor Diet

**Supplementary Figure 3.** Trends in Stroke and Coronary Heart Disease/Myocardial Infarction

**Supplementary Figure 4.** Geographic Distribution of Prevalence of Diabetes: 2017

**Supplementary Figure 5.** Geographic Distribution of Prevalence of Hypertension: 2017

**Supplementary Figure 6.** Geographic Distribution of Prevalence of Hypercholesterolemia: 2017

**Supplementary Figure 7.** Geographic Distribution of Prevalence of Obesity: 2017

**Supplementary Figure 8.** Geographic Distribution of Prevalence of Smoking: 2017

**Supplementary Figure 9.** Geographic Distribution of Prevalence of Physical Inactivity: 2017

**Supplementary Figure 10.** Geographic Distribution of Prevalence of Poor Diet: 2017

**Supplementary Figure 11.** Geographic Distribution of Prevalence of Stroke: 2017

**Supplementary Figure 12.** Geographic Distribution of Prevalence of Coronary Heart Disease/Myocardial infarction: 2017

**Supplementary Figure 13.** Relationship of Cardiovascular Mortality and Prevalence of Poor Cardiovascular Health in Males

**Supplementary Figure 14.** Relationship of Cardiovascular Mortality and Prevalence of Poor Cardiovascular Health in Females

**Supplementary Figure 15.** Relationship of Cardiovascular Mortality and Prevalence of Poor Cardiovascular Health in Non-Hispanic Whites

**Supplementary Figure 16.** Relationship of Cardiovascular Mortality and Prevalence of Poor Cardiovascular Health in Non-Hispanic Blacks

## Supplementary Methods

Adults  $\geq 18$  years of age and only non-pregnant females were included in the study sample. The state-level data on healthcare and demographic characteristics which included age (18-44, 45-64,  $\geq 65$  years), sex (males/females), race (non-Hispanic Whites, non-Hispanic Blacks, Hispanics, and others), annual household income ( $< \$15,000$ ,  $\$15,000$ - $\$25,000$ ,  $\$25,000$ - $\$35,000$ ,  $\$35,000$ - $\$50,000$ ,  $> \$50,000$ ), health insurance status (yes/no), and education level (less than high school, high school, more than high school), were also obtained. The questions from the Behavioral Risk Factor Surveillance System (BRFSS), which were used to define the CVHI metrics, are described in **Supplementary Table 1**. Hypertension was defined as a “yes” response to the question, “Have you ever been told by a doctor, nurse or another health professional that you have high blood pressure?” Individuals with current insulin use or self-reported history of diabetes outside of pregnancy or were defined as having diabetes. Obesity was determined using body-mass index computed from self-reported height and weight. The respondents who reported having smoked at least 100 cigarettes in their lifetime and currently smoke were determined as current smokers. Cardiac disease was defined as individuals who reported having coronary heart disease or myocardial infarction. Those who reported having a stroke were ascertained as individuals with stroke.

### *Covariates*

The covariates used in the statistical models were defined as follows: sex (binary categories: male [reference], female), race (ordinal categories: non-Hispanic Whites [reference], non-Hispanic Blacks, Hispanics, others), education (ordinal categories: less than high school, high school, more than high school [reference]), annual household income (ordinal categories:

<\$15,000, \$15,000-\$25,000, \$25,000-\$35,000, \$35,000-\$50,000, >\$50,000 [reference]), health insurance status (binary categories: yes [reference], no).

*Model Fit*

The tests of model effects for trend analyses of CVHI are shown in the table below:

| <b>Effect</b>           | <b>F Value</b> | <b>Pr&gt;F</b> |
|-------------------------|----------------|----------------|
| Model                   | 405.03         | <.0001         |
| Intercept               | 5633.41        | <.0001         |
| Year                    | 21.06          | <.0001         |
| Sex                     | 547.19         | <.0001         |
| Race                    | 50.79          | <.0001         |
| Education               | 558.33         | <.0001         |
| Annual Household Income | 338.51         | <.0001         |
| Health Insurance        | 131.56         | <.0001         |
| R <sup>2</sup> =0.14    |                |                |

**Supplementary Table 1. Calculation of Cardiovascular Health Index**

| <b>Cardiovascular Health Index Component</b> | <b>BRFSS Question</b>                                                                                                                                                                                                                                                                                                                                                                                                                                                                                                                                                                                                                                                                                                                      | <b>Criteria for Ideal Cardiovascular Health Components</b>                                                                                                               |
|----------------------------------------------|--------------------------------------------------------------------------------------------------------------------------------------------------------------------------------------------------------------------------------------------------------------------------------------------------------------------------------------------------------------------------------------------------------------------------------------------------------------------------------------------------------------------------------------------------------------------------------------------------------------------------------------------------------------------------------------------------------------------------------------------|--------------------------------------------------------------------------------------------------------------------------------------------------------------------------|
| Blood Pressure                               | Have you ever been told by a doctor, nurse, or another health professional that you have high blood pressure?                                                                                                                                                                                                                                                                                                                                                                                                                                                                                                                                                                                                                              | Never been told by a health professional that they have high blood pressure                                                                                              |
| Glucose                                      | Have you ever been told by a doctor that you have diabetes?                                                                                                                                                                                                                                                                                                                                                                                                                                                                                                                                                                                                                                                                                | Never been told by doctor that they have diabetes                                                                                                                        |
| Cholesterol                                  | Blood cholesterol is a fatty substance reported in the blood. Have you ever had your blood cholesterol checked? Have you ever been told by a doctor or other health professional that your blood cholesterol is high?                                                                                                                                                                                                                                                                                                                                                                                                                                                                                                                      | Individual had previously had their cholesterol checked and never been told by a health professional they have high cholesterol                                          |
| Body Mass Index                              | About how much do you weigh without shoes?<br>About how tall are you without shoes?                                                                                                                                                                                                                                                                                                                                                                                                                                                                                                                                                                                                                                                        | Body mass index 18.5-24.9 kg/m <sup>2</sup>                                                                                                                              |
| Smoking Status                               | Have you smoked at least 100 cigarettes in your entire life? Do you now smoke cigarettes every day, some days, or not at all?                                                                                                                                                                                                                                                                                                                                                                                                                                                                                                                                                                                                              | The participant had not smoked at least 100 cigarettes in their lifetime or reported smoking 100 cigarettes in their lifetime but not currently smoking                  |
| Physical Activity                            | During the past 30 days, other than your regular job, did you participate in any physical activities or exercise such as running, calisthenics, golf, gardening, or walking for exercise? How many times per week or per month did you take part in this activity during the past month? And when you took part in this activity, for how many minutes or hours did you usually keep at it? Estimated Activity Intensity for First Activity (Calculated by BRFSS) How many times per week or per month did you take part in this activity during the past month? And when you took part in this activity, for how many minutes or hours did you usually keep at it? Estimated Activity Intensity for Second Activity (Calculated by BRFSS) | The participant did ≥150 minutes a week of moderate-intensity activity or, ≥75 minutes of vigorous-intensity activity, or an equivalent combination of physical activity |
| Healthy Diet                                 | During the past month, not counting juice, how many times per day, week, or month did you eat fruit? Count fresh, frozen, or canned fruit. During the past month, how many times per day, week, or month did you eat orange-colored vegetables such as sweet potatoes, pumpkin, winter squash, or carrots? During the                                                                                                                                                                                                                                                                                                                                                                                                                      | Consuming 5 or more servings of fruits and vegetables per day                                                                                                            |

|  |                                                                                                                                                                                                                                                                                                                                           |  |
|--|-------------------------------------------------------------------------------------------------------------------------------------------------------------------------------------------------------------------------------------------------------------------------------------------------------------------------------------------|--|
|  | <p>past month, how many times per day, week, or month did you eat dark green vegetables, for example, broccoli or dark leafy greens including romaine, chard, collard greens, or spinach? Not counting what you just told me about, during the past month, about how many times per day, week, or month did you eat other vegetables?</p> |  |
|--|-------------------------------------------------------------------------------------------------------------------------------------------------------------------------------------------------------------------------------------------------------------------------------------------------------------------------------------------|--|

**Supplementary Table 2. Baseline Characteristics of the BRFSS Study Population: 2011-2017**

|                                |                          | <b>Northeast</b>           | <b>Midwest</b>             | <b>South</b>               | <b>West</b>                |
|--------------------------------|--------------------------|----------------------------|----------------------------|----------------------------|----------------------------|
|                                |                          | <b>Percentage (95% CI)</b> | <b>Percentage (95% CI)</b> | <b>Percentage (95% CI)</b> | <b>Percentage (95% CI)</b> |
| <b>Age Groups</b>              | <b>18-44 Years</b>       | 36.5 (36.2-36.9)           | 35.8 (35.5-36.2)           | 38.0 (37.6-38.3)           | 39.0 (38.6-39.4)           |
|                                | <b>45-64 Years</b>       | 40.1 (39.7-40.4)           | 40.6 (40.3-40.9)           | 38.9 (38.6-39.2)           | 38.8 (38.3-39.2)           |
|                                | <b>&gt;64 Years</b>      | 23.4 (23.1-23.7)           | 23.6 (23.4-23.8)           | 23.1 (22.9-23.3)           | 22.3 (21.9-22.6)           |
|                                | <b>Females</b>           | 51.3 (50.9-51.7)           | 50.9 (50.6-51.2)           | 51.3 (51.0-51.6)           | 50.4 (50.0-50.9)           |
| <b>Race/Ethnicity</b>          | <b>NH Whites</b>         | 73.3 (72.9-73.6)           | 82.4 (82.1-82.7)           | 66.1 (65.8-66.4)           | 60.0 (59.5-60.4)           |
|                                | <b>NH Blacks</b>         | 9.9 (9.6-10.1)             | 9.1 (8.8-9.3)              | 17.4 (17.2-17.7)           | 4.3 (4.1-4.5)              |
|                                | <b>Hispanics</b>         | 10.3 (10.1-10.6)           | 5.1 (4.9-5.3)              | 12.2 (12.0-12.5)           | 22.7 (22.3-23.1)           |
|                                | <b>Others</b>            | 6.5 (6.3-6.8)              | 3.5 (3.4-3.6)              | 4.2 (4.1-4.3)              | 13.0 (12.6-13.3)           |
| <b>Education</b>               | <b>&gt;High School</b>   | 61.0 (60.6-61.3)           | 60.9 (60.6-61.2)           | 59.1 (58.8-59.4)           | 65.5 (65.1-65.9)           |
|                                | <b>High School</b>       | 28.6 (28.2-28.9)           | 29.5 (29.2-29.8)           | 27.7 (27.5-28.0)           | 21.9 (21.6-22.3)           |
|                                | <b>&lt;High School</b>   | 10.5 (10.2-10.7)           | 9.6 (9.3-9.8)              | 13.2 (12.9-13.4)           | 12.6 (12.2-12.9)           |
|                                | <b>Health Insurance</b>  | 92.5 (92.3-92.7)           | 91.7 (91.5-91.9)           | 86.9 (86.7-87.2)           | 90.1 (89.9-90.4)           |
| <b>Annual Household Income</b> | <b>&lt;\$15,000</b>      | 55.0 (54.6-55.4)           | 50.9 (50.5-51.2)           | 46.8 (46.5-47.1)           | 52.9 (52.4-53.3)           |
|                                | <b>\$15,000-\$25,000</b> | 12.7 (12.5-13.0)           | 15.0 (14.7-15.2)           | 14.1 (13.9-14.4)           | 13.0 (12.7-13.3)           |
|                                | <b>\$25,000-\$35,000</b> | 9.3 (9.1-9.6)              | 10.7 (10.5-10.9)           | 10.9 (10.7-11.1)           | 9.7 (9.5-10.0)             |
|                                | <b>\$35,000-\$50,000</b> | 14.4 (14.1-14.7)           | 15.3 (15.1-15.6)           | 17.5 (17.2-17.7)           | 13.4 (13.2-13.7)           |
|                                | <b>&gt;\$50,000</b>      | 8.5 (8.3-8.7)              | 8.1 (7.9-8.3)              | 10.7 (10.5-10.9)           | 10.9 (10.6-11.3)           |

<sup>a</sup> Age-standardized as per 2010 United States Census population proportions. CI: Confidence Intervals.

**Supplementary Table 3. Relationship of Cardiovascular Health Index and Cardiovascular Mortality: Stratified by Region, Sex, and Race**

| <b>CVHI and Cardiovascular Mortality</b> | <b>Correlation Coefficient</b> | <b>P-Value</b> |
|------------------------------------------|--------------------------------|----------------|
| <b>Northeast</b>                         |                                |                |
| Overall                                  | 0.54                           | .14            |
| Sex                                      |                                |                |
| Males                                    | 0.55                           | .12            |
| Females                                  | 0.56                           | .12            |
| Race/Ethnicity                           |                                |                |
| Non-Hispanic Whites                      | 0.61                           | .08            |
| Non-Hispanic Blacks                      | 0.11                           | .78            |
| <b>Midwest</b>                           |                                |                |
| Overall                                  | 0.88                           | <.001          |
| Sex                                      |                                |                |
| Males                                    | 0.84                           | <.001          |
| Females                                  | 0.87                           | <.001          |
| Race/Ethnicity                           |                                |                |
| Non-Hispanic Whites                      | 0.42                           | .17            |
| Non-Hispanic Blacks                      | 0.86                           | <.001          |
| <b>South</b>                             |                                |                |
| Overall                                  | 0.70                           | .002           |
| Sex                                      |                                |                |
| Males                                    | 0.67                           | .003           |
| Females                                  | 0.62                           | .009           |
| Race/Ethnicity                           |                                |                |
| Non-Hispanic Whites                      | 0.80                           | <.001          |
| Non-Hispanic Blacks                      | 0.32                           | .21            |
| <b>West</b>                              |                                |                |
| Overall                                  | 0.77                           | .002           |
| Sex                                      |                                |                |
| Males                                    | 0.70                           | .008           |
| Females                                  | 0.62                           | .02            |
| Race/Ethnicity                           |                                |                |
| Non-Hispanic Whites                      | 0.44                           | .14            |
| Non-Hispanic Blacks                      | 0.21                           | .49            |



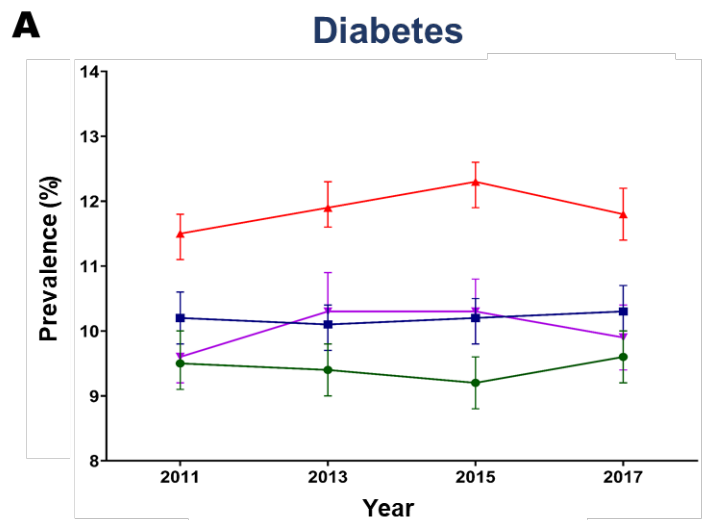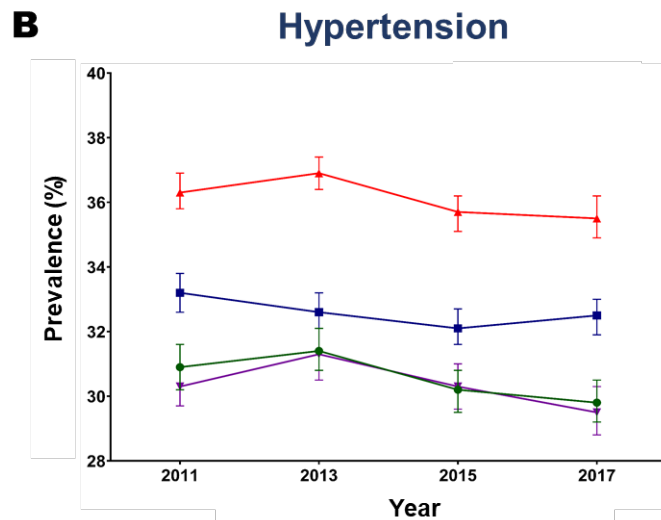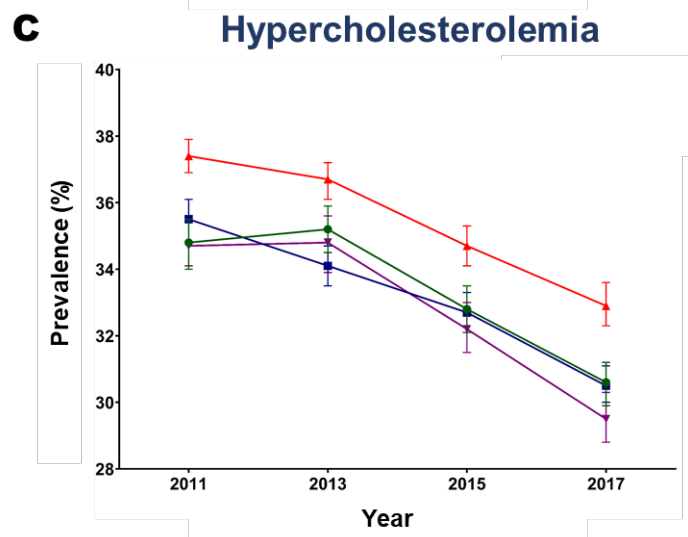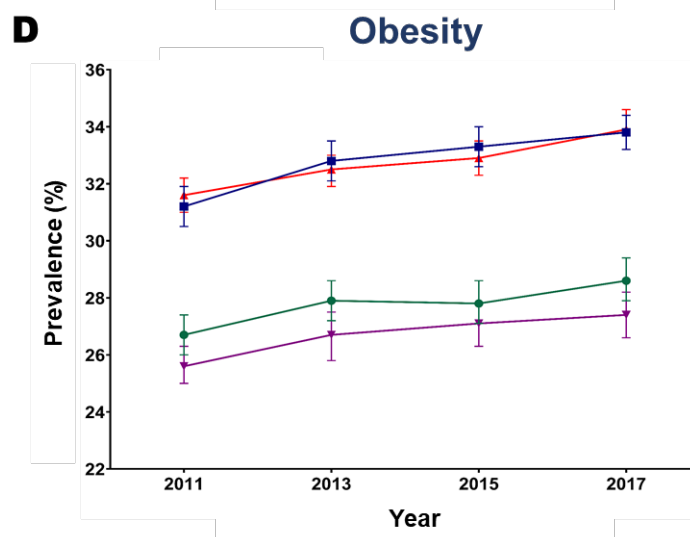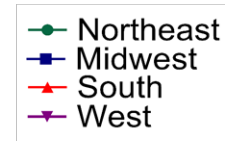

Supplementary Figure 1. Trends in Diabetes, Hypertension, Hypercholesterolemia, and Obesity

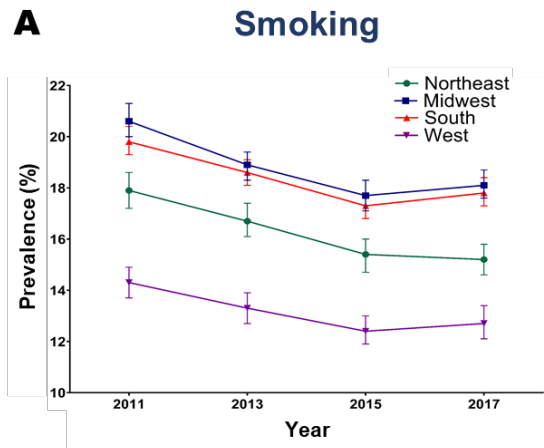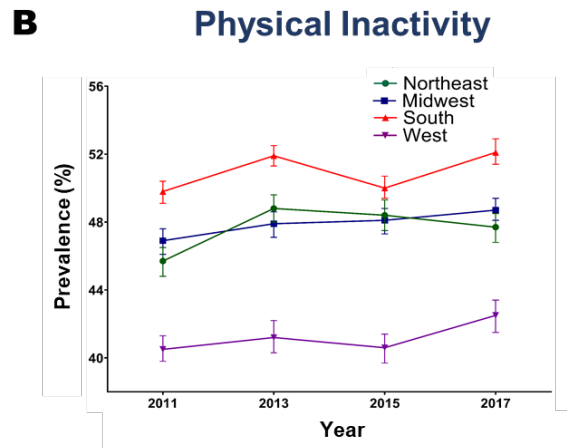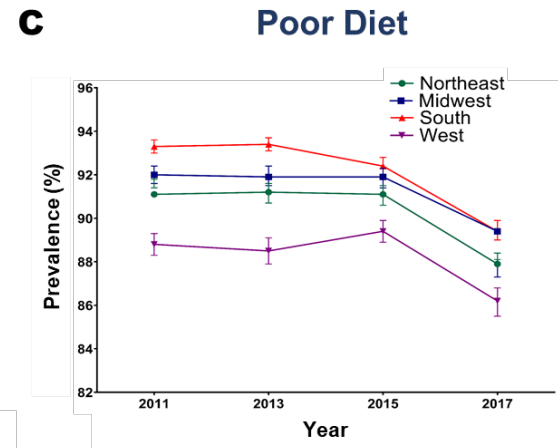

**Supplementary Figure 2. Trends in Smoking, Physical Inactivity, and Poor Diet**

**A****Stroke**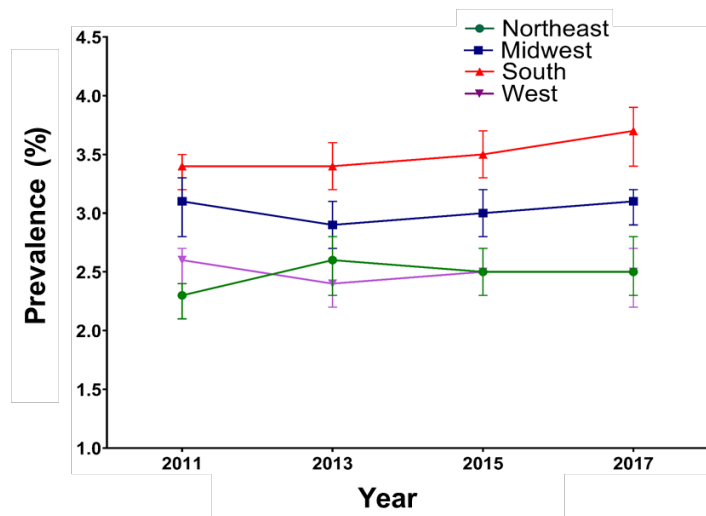**B****Coronary Heart Disease/  
Myocardial Infarction**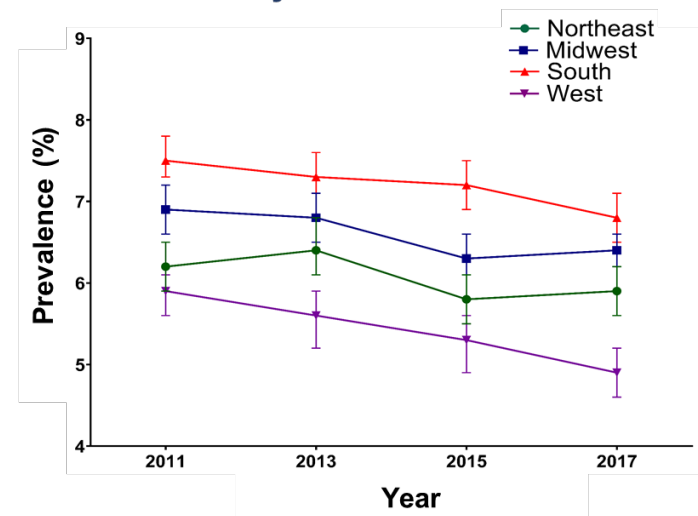**Supplementary Figure 3. Trends in Stroke and Coronary Heart Disease/Myocardial Infarction**

| Diabetes             |                   |
|----------------------|-------------------|
| Alabama              | 14.4 (13.3-15.6)  |
| Alaska               | 7.8 (6.4-9.2)     |
| Arizona              | 10.5 (9.8-11.2)   |
| Arkansas             | 12.3 (10.7-13.8)  |
| California           | 10.4 (9.4-11.4)   |
| Colorado             | 7.7 (7.0-8.4)     |
| Connecticut          | 9.2 (8.4-9.9)     |
| Delaware             | 10.2 (9.0-11.4)   |
| District of Columbia | 8.8 (7.7-9.8)     |
| Florida              | 9.2 (8.4-10.1)    |
| Georgia              | 11.9 (10.8-13.1)  |
| Hawaii               | 10.9 (9.8-11.9)   |
| Idaho                | 8.9 (7.8-10.0)    |
| Illinois             | 11.0 (9.9-12.1)   |
| Indiana              | 11.7 (11.0-12.4)  |
| Iowa                 | 9.4 (8.6-10.2)    |
| Kansas               | 10.7 (10.2-11.3)  |
| Kentucky             | 12.3 (11.12-13.4) |
| Louisiana            | 13.8 (12.3-15.3)  |
| Maine                | 9.8 (8.6-10.8)    |
| Maryland             | 10.2 (9.4-11.1)   |
| Massachusetts        | 8.8 (7.6-10.0)    |
| Michigan             | 10.4 (9.7-11.2)   |
| Minnesota            | 7.6 (7.0-8.2)     |
| Mississippi          | 14.3 (12.9-15.7)  |
| Missouri             | 10.1 (9.1-11.1)   |
| Montana              | 7.9 (6.9-9.0)     |
| Nebraska             | 10.1 (9.3-10.8)   |
| Nevada               | 10.6 (9.0-12.2)   |
| New Hampshire        | 8.0 (7.0-9.0)     |
| New Jersey           | 10.4 (9.4-11.3)   |
| New Mexico           | 10.8 (9.6-11.9)   |
| New York             | 9.9 (9.1-10.7)    |
| North Carolina       | 11.4 (10.1-12.6)  |
| North Dakota         | 9.4 (8.5-10.3)    |
| Ohio                 | 11.0 (10.2-11.8)  |
| Oklahoma             | 13.6 (12.3-14.8)  |
| Oregon               | 9.6 (8.6-10.7)    |
| Pennsylvania         | 9.7 (8.8-10.7)    |
| Rhode Island         | 8.4 (7.3-9.5)     |
| South Carolina       | 12.8 (11.9-13.6)  |
| South Dakota         | 10.8 (9.2-12.4)   |
| Tennessee            | 13.7 (12.4-15.0)  |
| Texas                | 12.8 (11.4-14.2)  |
| Utah                 | 8.3 (7.5-9.0)     |
| Vermont              | 7.6 (6.6-8.5)     |
| Virginia             | 10.8 (10.0-11.7)  |
| Washington           | 9.4 (8.7-10.1)    |
| West Virginia        | 14.8 (13.6-16.0)  |
| Wisconsin            | 8.9 (7.7-10.0)    |
| Wyoming              | 9.0 (7.9-10.0)    |

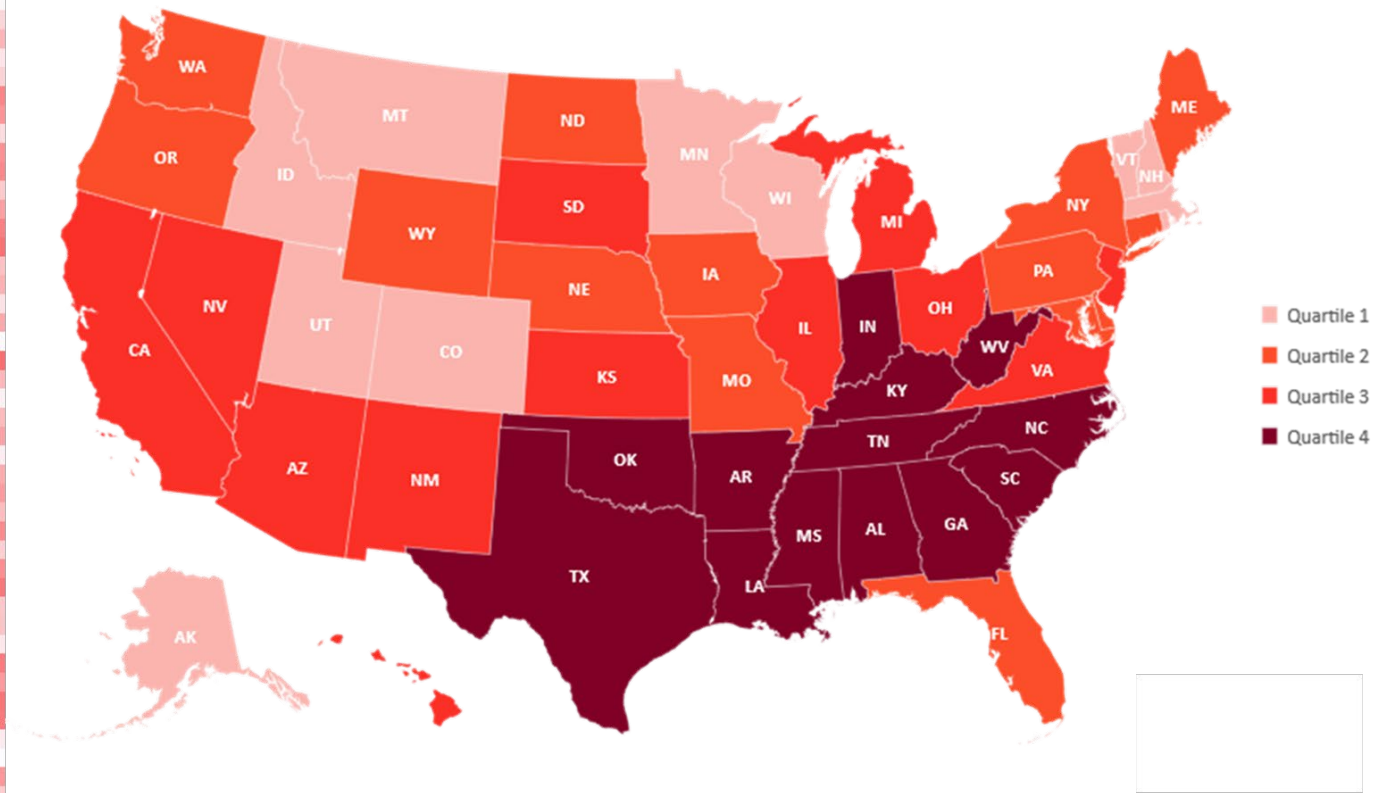

**PREVALENCE OF DIABETES: 2017**

**Supplementary Figure 4. Geographic Distribution of Prevalence of Diabetes: 2017**

| Hypertension         |                  |
|----------------------|------------------|
| Alabama              | 42.0 (40.1-43.8) |
| Alaska               | 34.4 (31.3-37.3) |
| Arizona              | 30.2 (29.2-31.2) |
| Arkansas             | 42.4 (39.4-45.4) |
| California           | 29.4 (28.0-30.8) |
| Colorado             | 26.2 (25.1-27.4) |
| Connecticut          | 29.3 (27.9-30.6) |
| Delaware             | 33.4 (31.0-35.8) |
| District of Columbia | 29.9 (23.1-31.7) |
| Florida              | 32.6 (31.0-34.3) |
| Georgia              | 33.9 (32.2-35.6) |
| Hawaii               | 31.1 (29.5-32.6) |
| Idaho                | 31.0 (29.1-32.8) |
| Illinois             | 32.4 (30.7-34.0) |
| Indiana              | 36.2 (35.0-37.4) |
| Iowa                 | 31.0 (29.7-32.4) |
| Kansas               | 34.4 (33.5-35.3) |
| Kentucky             | 40.3 (38.4-42.2) |
| Louisiana            | 39.7 (37.8-41.7) |
| Maine                | 31.8 (30.1-33.4) |
| Maryland             | 31.7 (30.4-33.0) |
| Massachusetts        | 27.4 (25.5-29.2) |
| Michigan             | 33.7 (32.5-35.0) |
| Minnesota            | 26.2 (25.3-27.2) |
| Mississippi          | 42.2 (40.0-44.4) |
| Missouri             | 32.3 (30.6-33.9) |
| Montana              | 27.6 (25.8-29.4) |
| Nebraska             | 31.3 (30.0-32.5) |
| Nevada               | 32.6 (30.2-35.0) |
| New Hampshire        | 28.2 (26.2-30.1) |
| New Jersey           | 31.4 (29.8-33.1) |
| New Mexico           | 30.9 (29.1-32.6) |
| New York             | 28.8 (27.6-30.0) |
| North Carolina       | 34.4 (32.5-36.3) |
| North Dakota         | 31.1 (29.5-32.6) |
| Ohio                 | 34.2 (32.8-35.6) |
| Oklahoma             | 39.0 (37.2-40.7) |
| Oregon               | 29.8 (28.1-31.5) |
| Pennsylvania         | 31.5 (29.8-33.1) |
| Rhode Island         | 32.3 (30.3-34.3) |
| South Carolina       | 37.5 (36.1-39.0) |
| South Dakota         | 30.0 (27.8-32.2) |
| Tennessee            | 39.2 (37.1-41.3) |
| Texas                | 34.7 (32.7-36.7) |
| Utah                 | 28.0 (26.8-29.2) |
| Vermont              | 28.5 (26.7-30.3) |
| Virginia             | 32.2 (30.7-33.7) |
| Washington           | 30.0 (28.8-31.1) |
| West Virginia        | 42.4 (40.5-44.3) |
| Wisconsin            | 29.6 (27.7-31.4) |
| Wyoming              | 30.7 (28.8-32.5) |

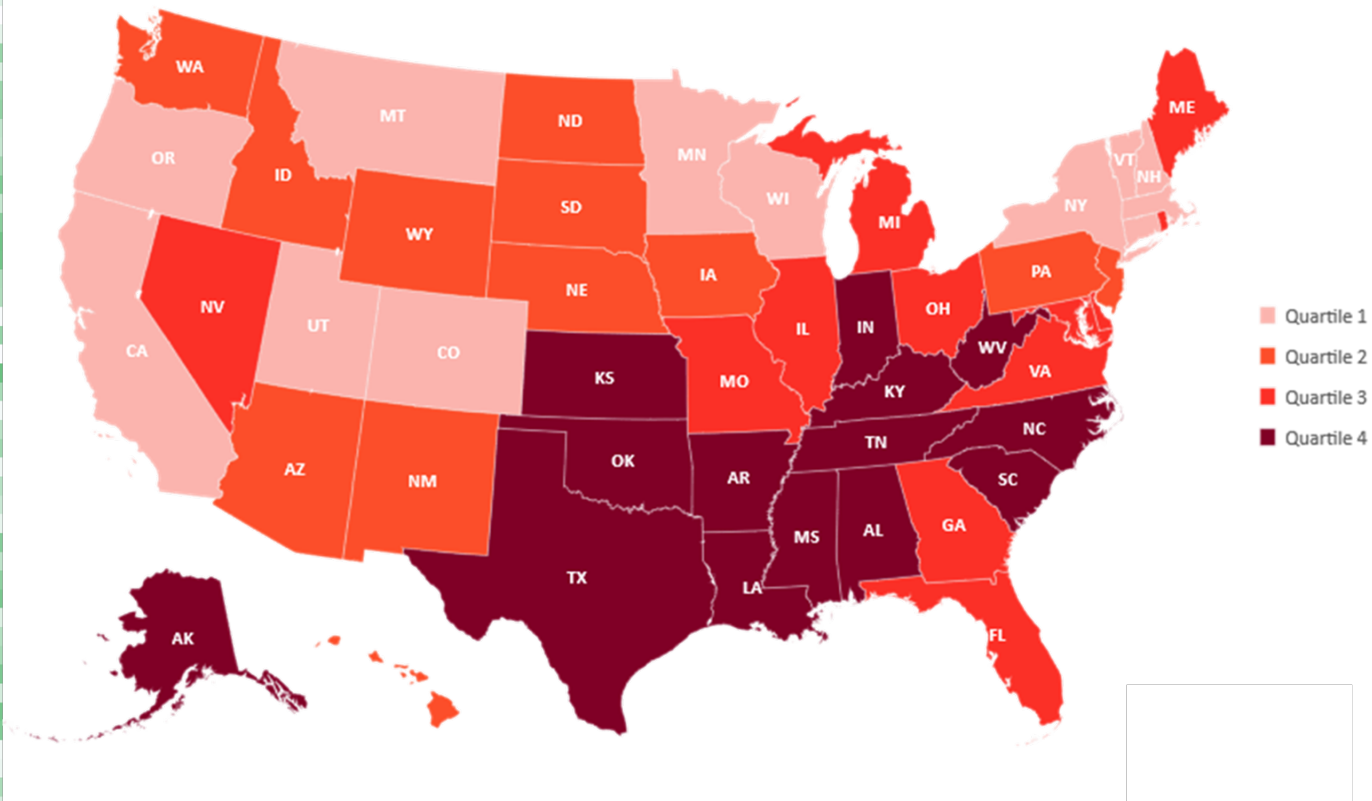

**PREVALENCE OF HYPERTENSION: 2017**

Supplementary Figure 5. Geographic Distribution of Prevalence of Hypertension: 2017

| Hypercholesterolemia |                  |
|----------------------|------------------|
| Alabama              | 34.1 (32.4-35.8) |
| Alaska               | 29.6 (26.9-32.2) |
| Arizona              | 31.3 (30.2-32.4) |
| Arkansas             | 33.2 (30.7-35.6) |
| California           | 29.4 (27.9-30.8) |
| Colorado             | 28.9 (27.7-30.0) |
| Connecticut          | 29.8 (28.4-31.2) |
| Delaware             | 32.5 (29.9-35.1) |
| District of Columbia | 28.1 (26.2-30.0) |
| Florida              | 32.7 (31.0-34.5) |
| Georgia              | 30.6 (28.9-32.2) |
| Hawaii               | 30.2 (28.6-31.8) |
| Idaho                | 28.9 (26.9-30.8) |
| Illinois             | 30.6 (29.0-32.2) |
| Indiana              | 31.5 (30.4-32.6) |
| Iowa                 | 29.7 (28.4-31.0) |
| Kansas               | 31.5 (30.6-32.3) |
| Kentucky             | 35.6 (33.8-37.5) |
| Louisiana            | 35.3 (33.3-37.2) |
| Maine                | 32.3 (30.6-34.0) |
| Maryland             | 31.0 (29.7-32.3) |
| Massachusetts        | 29.9 (27.9-31.8) |
| Michigan             | 31.9 (30.6-33.1) |
| Minnesota            | 26.4 (25.5-27.3) |
| Mississippi          | 35.6 (33.6-37.7) |
| Missouri             | 31.4 (29.7-33.1) |
| Montana              | 24.7 (23.0-26.5) |
| Nebraska             | 29.8 (28.6-31.1) |
| Nevada               | 32.4 (29.8-35.0) |
| New Hampshire        | 28.8 (26.9-30.7) |
| New Jersey           | 33.7 (32.0-35.4) |
| New Mexico           | 29.2 (27.4-31.0) |
| New York             | 30.5 (29.2-31.8) |
| North Carolina       | 33.0 (31.1-35.0) |
| North Dakota         | 29.2 (27.8-30.7) |
| Ohio                 | 30.3 (29.0-31.7) |
| Oklahoma             | 34.8 (33.1-36.5) |
| Oregon               | 29.3 (27.5-31.0) |
| Pennsylvania         | 29.3 (27.7-30.9) |
| Rhode Island         | 29.7 (27.8-31.6) |
| South Carolina       | 33.4 (32.0-34.8) |
| South Dakota         | 26.3 (24.2-28.3) |
| Tennessee            | 33.7 (31.7-35.7) |
| Texas                | 32.6 (30.6-34.5) |
| Utah                 | 28.2 (27.0-29.4) |
| Vermont              | 26.3 (24.7-28.0) |
| Virginia             | 32.9 (31.3-34.5) |
| Washington           | 29.9 (28.7-31.0) |
| West Virginia        | 35.3 (35.6-37.1) |
| Wisconsin            | 31.4 (29.5-33.4) |
| Wyoming              | 27.6 (25.9-29.3) |

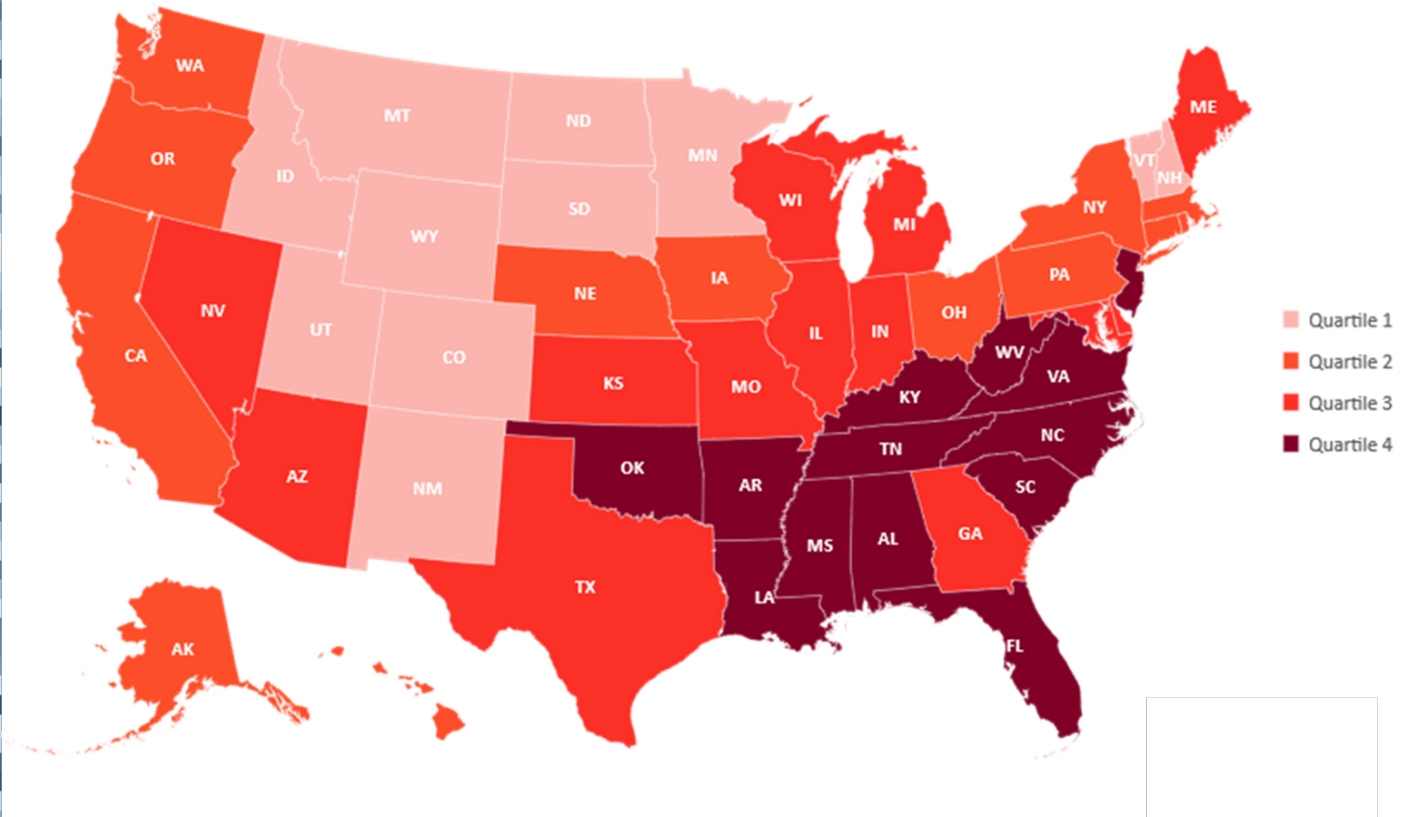

**PREVALENCE OF HYPERCHOLESTEROLEMIA: 2017**

Supplementary Figure 6. Geographic Distribution of Prevalence of Hypercholesterolemia: 2017

| Obesity              |                   |
|----------------------|-------------------|
| Alabama              | 38.8 (36.8-40.8)  |
| Alaska               | 35.5 (32.2-38.9)  |
| Arizona              | 31.3 (30.1-32.6)  |
| Arkansas             | 38.4 (35.2-41.6)  |
| California           | 26.0 (24.5-27.5)  |
| Colorado             | 24.4 (23.1-25.7)  |
| Connecticut          | 27.9 (26.3-29.4)  |
| Delaware             | 32.9 (30.2-35.6)  |
| District of Columbia | 25.1 (23.01-27.1) |
| Florida              | 30.1 (28.2-32.0)  |
| Georgia              | 32.7 (30.8-34.6)  |
| Hawaii               | 26.3 (24.6-28.0)  |
| Idaho                | 30.5 (28.3-32.7)  |
| Illinois             | 32.0 (30.2-33.9)  |
| Indiana              | 35.7 (34.3-37.0)  |
| Iowa                 | 38.8 (37.1-40.4)  |
| Kansas               | 34.7 (33.7-35.8)  |
| Kentucky             | 36.1 (34.1-38.2)  |
| Louisiana            | 38.6 (36.3-40.8)  |
| Maine                | 30.0 (28.1-31.8)  |
| Maryland             | 32.1 (30.5-33.6)  |
| Massachusetts        | 28.8 (24.7-29.0)  |
| Michigan             | 34.1 (32.7-35.6)  |
| Minnesota            | 29.9 (28.8-31.0)  |
| Mississippi          | 39.0 (36.5-41.5)  |
| Missouri             | 34.1 (32.2-36.0)  |
| Montana              | 27.1 (25.1-29.1)  |
| Nebraska             | 34.6 (33.2-36.1)  |
| Nevada               | 27.4 (24.8-30.1)  |
| New Hampshire        | 29.8 (27.3-32.2)  |
| New Jersey           | 27.0 (25.3-28.7)  |
| New Mexico           | 30.9 (28.8-32.9)  |
| New York             | 26.7 (25.4-28.0)  |
| North Carolina       | 34.1 (32.0-36.3)  |
| North Dakota         | 35.5 (33.7-37.4)  |
| Ohio                 | 35.1 (33.5-36.7)  |
| Oklahoma             | 39.6 (37.6-41.7)  |
| Oregon               | 32.1 (30.1-34.1)  |
| Pennsylvania         | 33.3 (31.4-35.2)  |
| Rhode Island         | 31.3 (29.0-33.5)  |
| South Carolina       | 36.3 (34.7-38.0)  |
| South Dakota         | 33.9 (31.2-36.6)  |
| Tennessee            | 35.0 (32.8-37.1)  |
| Texas                | 34.0 (31.9-36.1)  |
| Utah                 | 27.4 (26.0-28.7)  |
| Vermont              | 29.4 (27.2-31.6)  |
| Virginia             | 31.0 (29.3-32.6)  |
| Washington           | 29.4 (28.1-30.7)  |
| West Virginia        | 41.3 (39.2-43.3)  |
| Wisconsin            | 33.3 (31.1-35.5)  |
| Wyoming              | 30.1 (28.0-32.1)  |

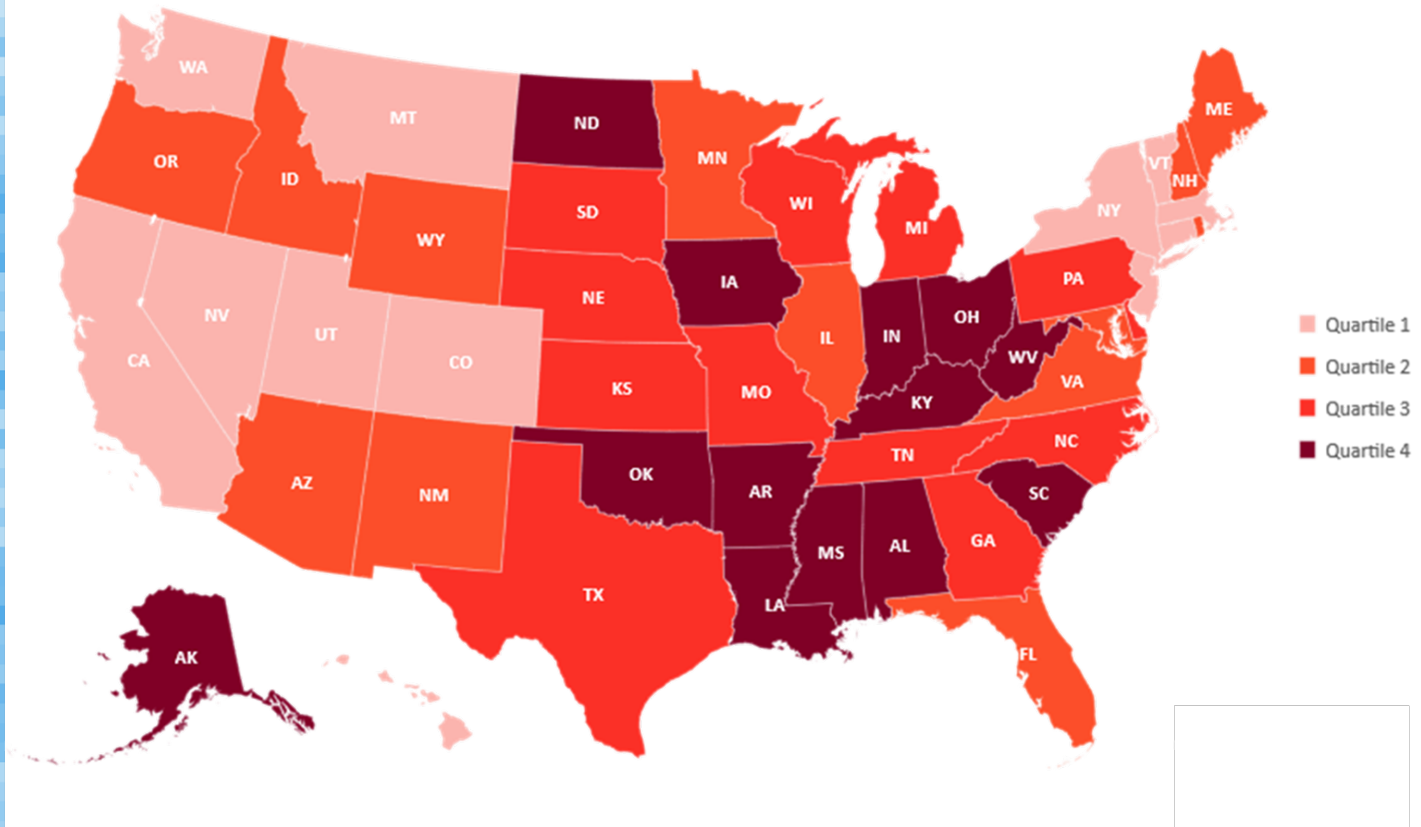

**PREVALENCE OF OBESITY: 2017**

Supplementary Figure 7. Geographic Distribution of Prevalence of Obesity: 2017



| Smoking              |                  |
|----------------------|------------------|
| Alabama              | 21.3 (19.4-23.1) |
| Alaska               | 18.3 (15.2-21.0) |
| Arizona              | 15.7 (14.7-16.7) |
| Arkansas             | 22.7 (19.7-25.7) |
| California           | 11.0 (9.8-12.2)  |
| Colorado             | 14.0 (12.9-15.1) |
| Connecticut          | 13.3 (12.0-15.6) |
| Delaware             | 16.9 (14.7-19.2) |
| District of Columbia | 14.6 (13.0-16.3) |
| Florida              | 16.6 (15.1-18.2) |
| Georgia              | 16.5 (15.0-18.0) |
| Hawaii               | 13.0 (11.7-14.3) |
| Idaho                | 13.7 (12.0-15.5) |
| Illinois             | 15.2 (13.7-16.8) |
| Indiana              | 21.3 (20.0-22.5) |
| Iowa                 | 16.4 (15.1-17.8) |
| Kansas               | 17.1 (16.2-18.0) |
| Kentucky             | 24.7 (22.8-22.7) |
| Louisiana            | 22.3 (20.2-24.2) |
| Maine                | 17.0 (15.5-18.6) |
| Maryland             | 14.0 (12.8-15.2) |
| Massachusetts        | 13.8 (12.1-15.5) |
| Michigan             | 19.4 (18.2-20.7) |
| Minnesota            | 13.7 (12.8-14.6) |
| Mississippi          | 20.6 (18.4-22.8) |
| Missouri             | 20.8 (19.1-22.6) |
| Montana              | 17.0 (15.1-19.0) |
| Nebraska             | 14.9 (13.8-16.1) |
| Nevada               | 18.6 (16.2-20.9) |
| New Hampshire        | 15.7 (13.5-17.8) |
| New Jersey           | 14.4 (13.0-15.8) |
| New Mexico           | 16.9 (15.1-18.6) |
| New York             | 13.6 (12.5-14.6) |
| North Carolina       | 17.2 (15.4-18.9) |
| North Dakota         | 18.4 (16.8-19.9) |
| Ohio                 | 21.7 (20.2-23.1) |
| Oklahoma             | 20.3 (18.5-22.1) |
| Oregon               | 16.1 (14.5-17.8) |
| Pennsylvania         | 19.4 (17.7-21.0) |
| Rhode Island         | 15.0 (13.1-16.9) |
| South Carolina       | 18.4 (17.0-19.7) |
| South Dakota         | 18.2 (15.9-20.6) |
| Tennessee            | 22.8 (20.7-22.9) |
| Texas                | 15.4 (13.6-17.1) |
| Utah                 | 8.3 (7.4-9.2)    |
| Vermont              | 15.6 (13.7-17.4) |
| Virginia             | 16.1 (14.7-17.4) |
| Washington           | 12.7 (11.8-13.7) |
| West Virginia        | 26.5 (24.8-28.5) |
| Wisconsin            | 16.0 (14.3-17.7) |
| Wyoming              | 16.5 (15.6-19.3) |

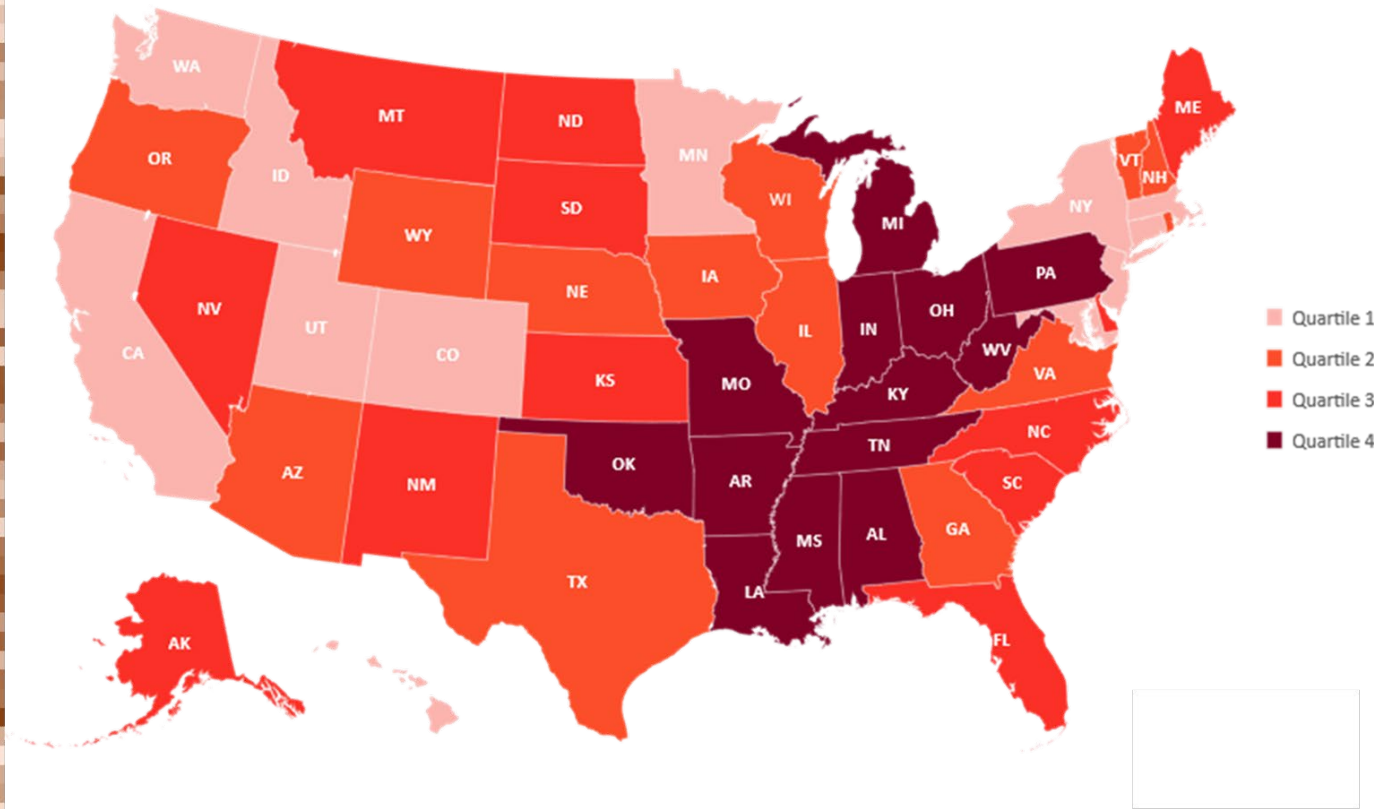

**PREVALENCE OF SMOKING: 2017**

Supplementary Figure 8. Geographic Distribution of Prevalence of Smoking: 2017



| Physical Inactivity  |                  |
|----------------------|------------------|
| Alabama              | 55.7 (53.6-57.8) |
| Alaska               | 40.1 (36.6-43.5) |
| Arizona              | 46.5 (45.1-47.8) |
| Arkansas             | 54.8 (51.5-58.1) |
| California           | 41.6 (39.8-43.3) |
| Colorado             | 39.4 (37.9-40.9) |
| Connecticut          | 47.3 (45.6-49.1) |
| Delaware             | 51.4 (48.4-54.3) |
| District of Columbia | 44.3 (41.8-46.7) |
| Florida              | 49.4 (47.3-51.4) |
| Georgia              | 51.9 (49.9-53.9) |
| Hawaii               | 43.6 (41.7-45.5) |
| Idaho                | 44.2 (41.8-46.6) |
| Illinois             | 46.8 (44.8-48.8) |
| Indiana              | 51.8 (50.4-53.2) |
| Iowa                 | 49.1 (47.4-50.8) |
| Kansas               | 48.9 (47.8-50.0) |
| Kentucky             | 53.5 (51.4-55.7) |
| Louisiana            | 53.1 (50.8-55.5) |
| Maine                | 46.4 (44.3-48.4) |
| Maryland             | 48.6 (46.9-50.3) |
| Massachusetts        | 46.0 (43.6-48.4) |
| Michigan             | 49.6 (48.1-51.2) |
| Minnesota            | 46.9 (45.7-48.2) |
| Mississippi          | 54.8 (52.2-57.4) |
| Missouri             | 50.1 (48.0-52.1) |
| Montana              | 43.0 (40.7-45.3) |
| Nebraska             | 48.7 (47.2-50.3) |
| Nevada               | 52.1 (49.1-55.0) |
| New Hampshire        | 45.4 (42.7-48.0) |
| New Jersey           | 49.3 (47.4-51.3) |
| New Mexico           | 45.1 (42.9-47.3) |
| New York             | 49.3 (47.7-50.8) |
| North Carolina       | 49.8 (47.5-52.0) |
| North Dakota         | 53.5 (51.6-55.5) |
| Ohio                 | 51.0 (49.3-52.7) |
| Oklahoma             | 55.8 (53.7-57.9) |
| Oregon               | 41.4 (39.3-43.6) |
| Pennsylvania         | 46.0 (44.0-48.0) |
| Rhode Island         | 47.9 (45.4-50.3) |
| South Carolina       | 50.0 (48.3-51.7) |
| South Dakota         | 46.8 (43.9-49.7) |
| Tennessee            | 52.0 (49.7-54.4) |
| Texas                | 56.4 (54.1-58.6) |
| Utah                 | 43.0 (41.5-44.5) |
| Vermont              | 38.8 (36.5-41.1) |
| Virginia             | 47.9 (46.1-49.7) |
| Washington           | 40.7 (39.3-42.1) |
| West Virginia        | 50.0 (47.9-52.1) |
| Wisconsin            | 43.2 (40.9-45.5) |
| Wyoming              | 45.6 (43.3-47.9) |

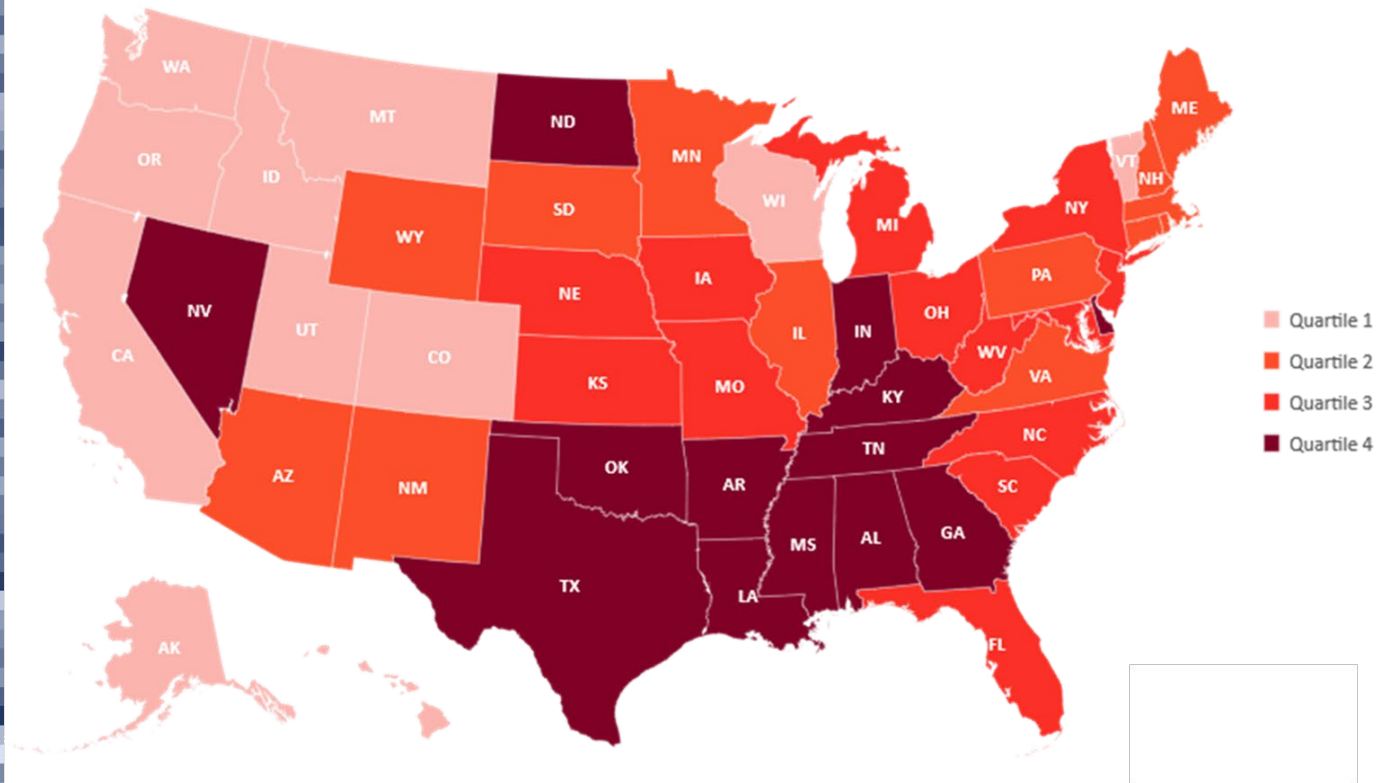

**PREVALENCE OF PHYSICAL INACTIVITY: 2017**

**Supplementary Figure 9. Geographic Distribution of Prevalence of Physical Inactivity: 2017**

| Poor Diet            |                  |
|----------------------|------------------|
| Alabama              | 92.5 (91.4-93.6) |
| Alaska               | 88.9 (86.7-91.0) |
| Arizona              | 86.6 (85.7-87.5) |
| Arkansas             | 87.6 (85.2-90.0) |
| California           | 85.9 (84.7-87.1) |
| Colorado             | 85.8 (84.8-86.9) |
| Connecticut          | 85.0 (83.7-86.2) |
| Delaware             | 87.1 (85.1-89.2) |
| District of Columbia | 78.3 (76.3-80.2) |
| Florida              | 88.2 (87.0-89.4) |
| Georgia              | 88.1 (86.7-89.5) |
| Hawaii               | 85.3 (83.8-86.7) |
| Idaho                | 87.7 (86.0-89.3) |
| Illinois             | 87.8 (86.5-89.0) |
| Indiana              | 89.7 (88.8-90.6) |
| Iowa                 | 90.2 (89.1-91.2) |
| Kansas               | 88.6 (87.9-89.3) |
| Kentucky             | 92.0 (90.7-93.2) |
| Louisiana            | 90.2 (88.8-91.7) |
| Maine                | 83.3 (81.7-84.9) |
| Maryland             | 86.7 (85.5-87.8) |
| Massachusetts        | 87.1 (85.5-88.7) |
| Michigan             | 90.6 (89.8-91.5) |
| Minnesota            | 86.8 (86.0-87.7) |
| Mississippi          | 92.0 (90.6-93.5) |
| Missouri             | 92.3 (91.2-93.4) |
| Montana              | 90.5 (89.0-92.0) |
| Nebraska             | 89.7 (88.7-90.6) |
| Nevada               | 91.6 (90.1-93.1) |
| New Hampshire        | 82.9 (81.1-84.7) |
| New Jersey           | 88.8 (87.7-90.0) |
| New Mexico           | 89.1 (87.6-90.5) |
| New York             | 88.3 (87.3-89.3) |
| North Carolina       | 88.8 (87.3-90.3) |
| North Dakota         | 89.0 (87.7-90.3) |
| Ohio                 | 90.1 (89.1-91.1) |
| Oklahoma             | 93.6 (92.5-94.7) |
| Oregon               | 84.4 (82.8-85.9) |
| Pennsylvania         | 89.2 (88.1-90.4) |
| Rhode Island         | 83.9 (82.2-85.7) |
| South Carolina       | 92.2 (91.3-93.1) |
| South Dakota         | 91.3 (89.5-93.0) |
| Tennessee            | 90.2 (88.8-91.6) |
| Texas                | 90.1 (88.8-91.4) |
| Utah                 | 87.3 (86.3-88.4) |
| Vermont              | 81.4 (79.4-83.4) |
| Virginia             | 87.9 (86.7-89.1) |
| Washington           | 83.6 (82.6-84.7) |
| West Virginia        | 95.0 (94.1-95.9) |
| Wisconsin            | 88.4 (86.8-89.9) |
| Wyoming              | 89.3 (87.9-90.8) |

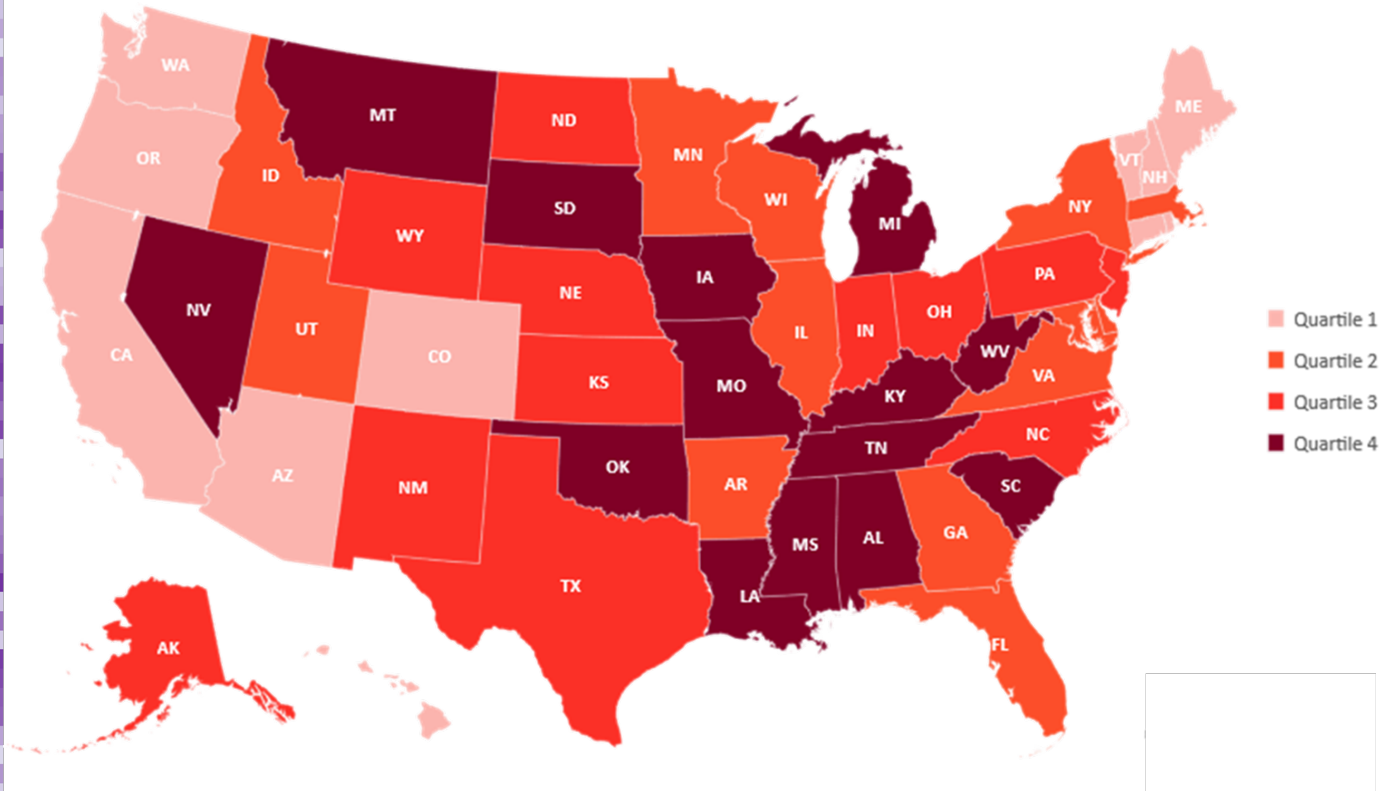

**PREVALENCE OF POOR DIET: 2017**

**Supplementary Figure 10.** Geographic Distribution of Prevalence of Poor Diet: 2017

|                      | Stroke        |
|----------------------|---------------|
| Alabama              | 4.5 (3.8-5.2) |
| Alaska               | 2.2 (1.4-3.1) |
| Arizona              | 2.7 (2.4-3.1) |
| Arkansas             | 5.4 (4.1-6.8) |
| California           | 2.2 (1.8-2.7) |
| Colorado             | 2.2 (1.8-2.6) |
| Connecticut          | 2.3 (1.9-2.7) |
| Delaware             | 2.9 (2.3-3.5) |
| District of Columbia | 2.6 (2.0-3.2) |
| Florida              | 3.2 (2.7-3.8) |
| Georgia              | 3.6 (3.0-4.2) |
| Hawaii               | 2.7 (2.2-3.2) |
| Idaho                | 2.5 (2.0-3.1) |
| Illinois             | 2.8 (2.2-3.3) |
| Indiana              | 3.4 (3.0-3.8) |
| Iowa                 | 2.6 (2.2-3.1) |
| Kansas               | 2.8 (2.5-3.1) |
| Kentucky             | 4.6 (3.8-5.4) |
| Louisiana            | 4.7 (3.9-5.5) |
| Maine                | 2.5 (2.0-3.0) |
| Maryland             | 2.8 (2.4-3.3) |
| Massachusetts        | 2.2 (1.6-2.7) |
| Michigan             | 3.6 (3.1-4.2) |
| Minnesota            | 2.0 (1.7-2.2) |
| Mississippi          | 4.6 (3.8-5.4) |
| Missouri             | 4.3 (3.6-5.0) |
| Montana              | 2.2 (1.7-2.7) |
| Nebraska             | 2.7 (2.3-3.1) |
| Nevada               | 3.3 (2.4-4.1) |
| New Hampshire        | 2.3 (1.8-2.9) |
| New Jersey           | 2.3 (1.9-2.6) |
| New Mexico           | 3.0 (2.4-3.6) |
| New York             | 2.3 (1.9-2.7) |
| North Carolina       | 3.4 (2.6-4.2) |
| North Dakota         | 2.6 (2.1-3.1) |
| Ohio                 | 3.4 (2.9-3.9) |
| Oklahoma             | 4.3 (3.6-5.0) |
| Oregon               | 2.8 (2.2-3.3) |
| Pennsylvania         | 3.3 (2.7-4.0) |
| Rhode Island         | 2.7 (2.1-3.2) |
| South Carolina       | 3.7 (3.2-4.2) |
| South Dakota         | 2.4 (1.6-3.1) |
| Tennessee            | 4.0 (3.2-4.8) |
| Texas                | 3.7 (2.8-4.5) |
| Utah                 | 2.5 (2.0-2.9) |
| Vermont              | 2.0 (1.6-2.4) |
| Virginia             | 3.0 (2.5-3.5) |
| Washington           | 2.9 (2.5-3.3) |
| West Virginia        | 4.6 (3.9-5.4) |
| Wisconsin            | 2.0 (1.5-2.5) |
| Wyoming              | 3.1 (2.5-3.7) |

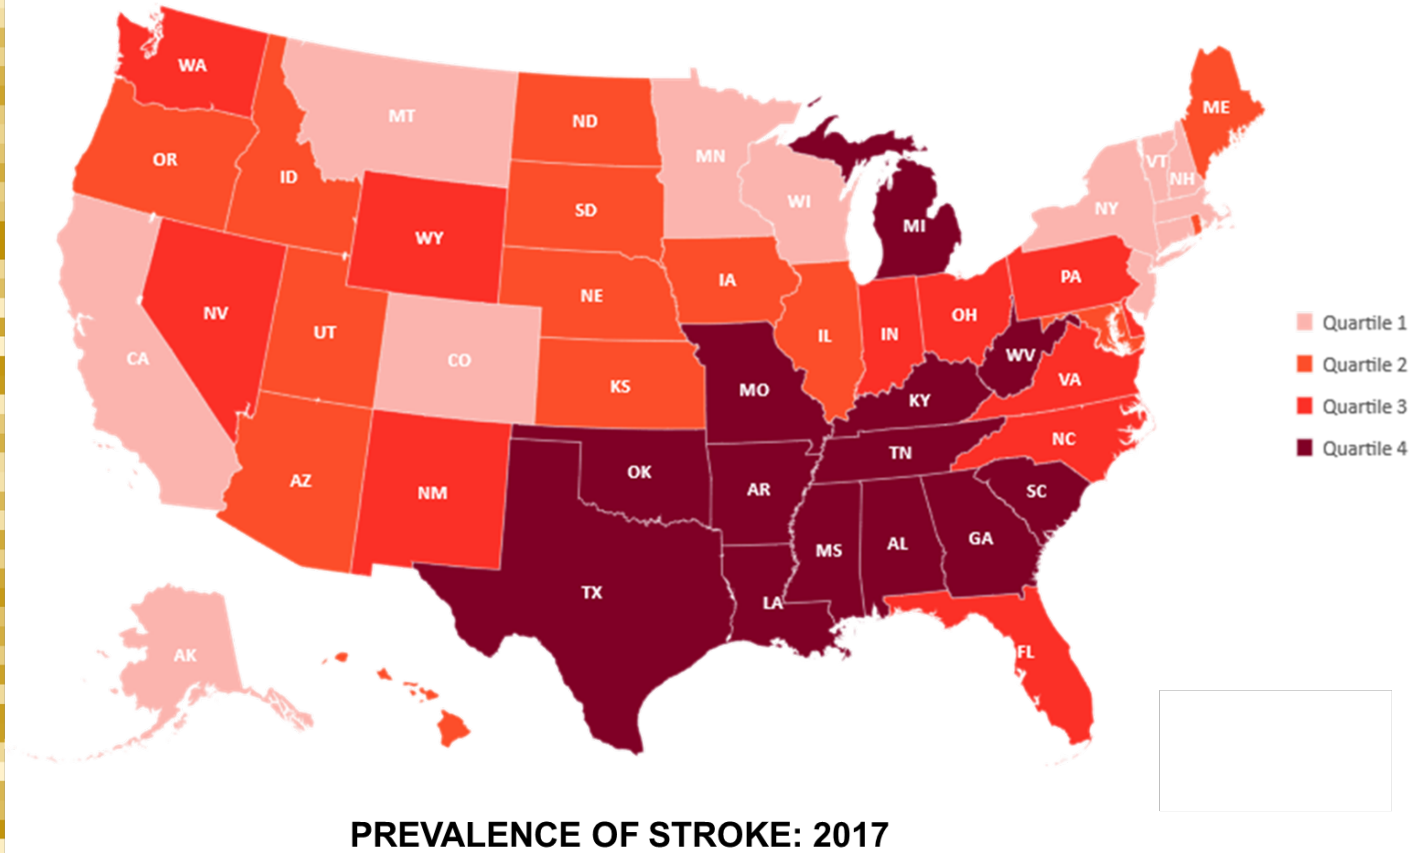

Supplementary Figure 11. Geographic Distribution of Prevalence of Stroke: 2017

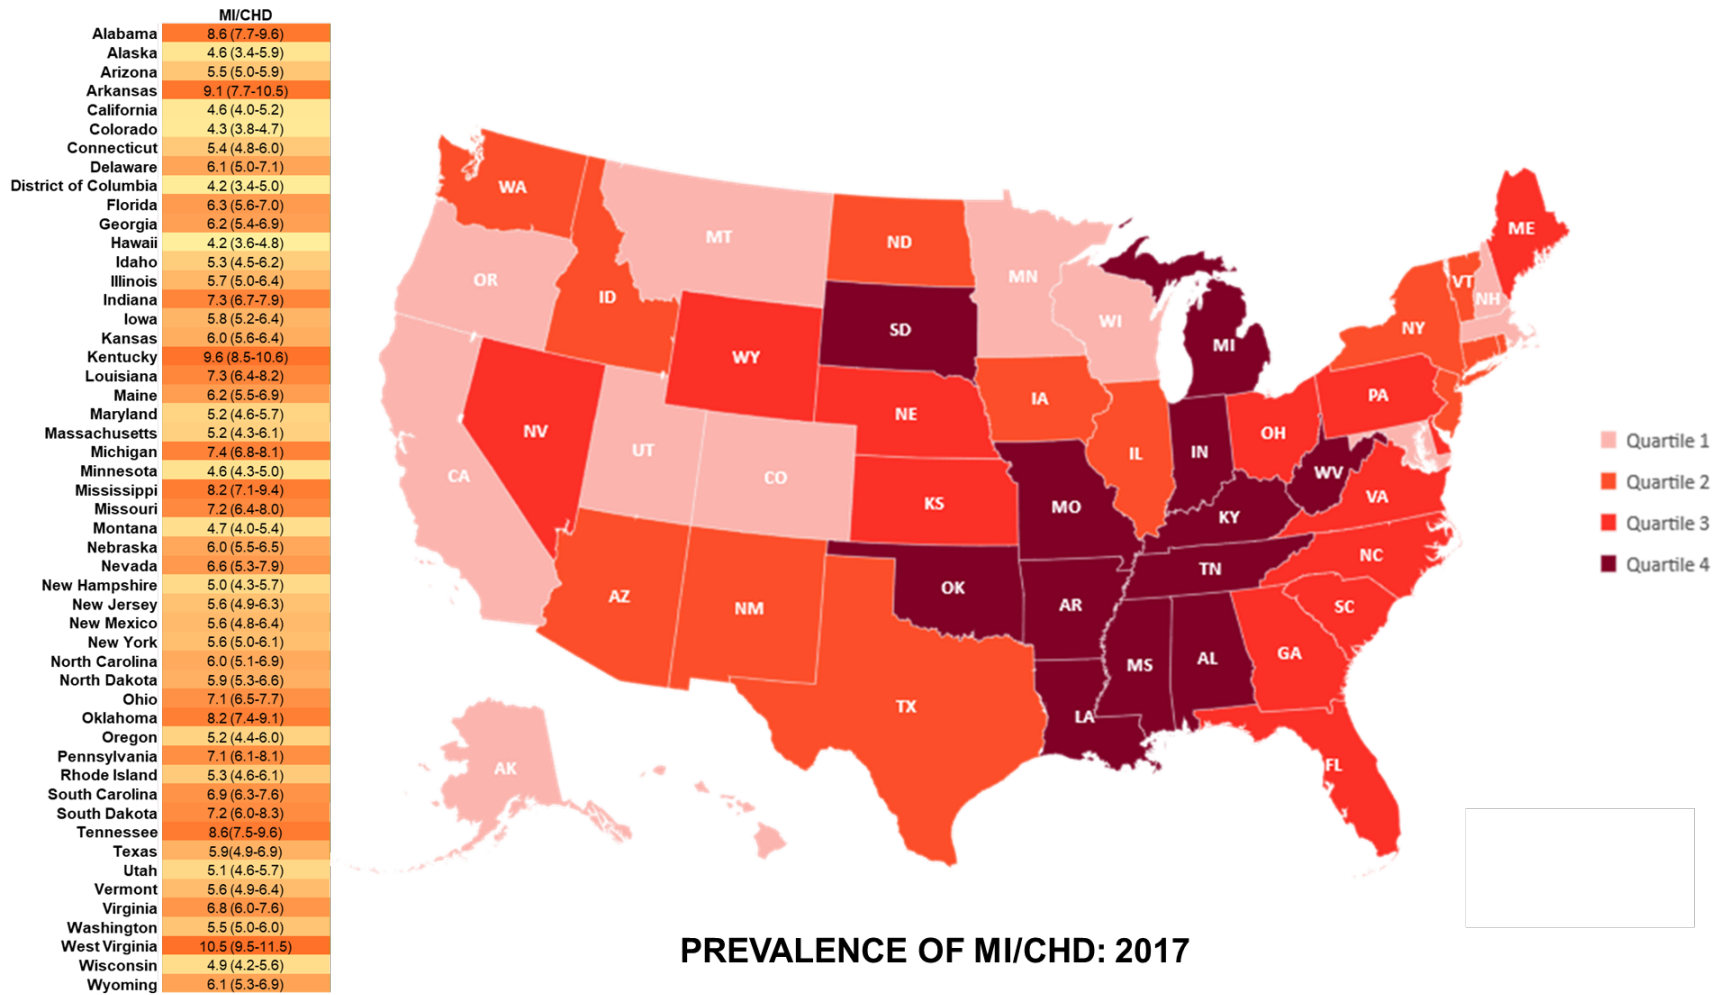

**Supplementary Figure 12.** Geographic Distribution of Prevalence of Myocardial Infarction/Coronary Heart Disease: 2017

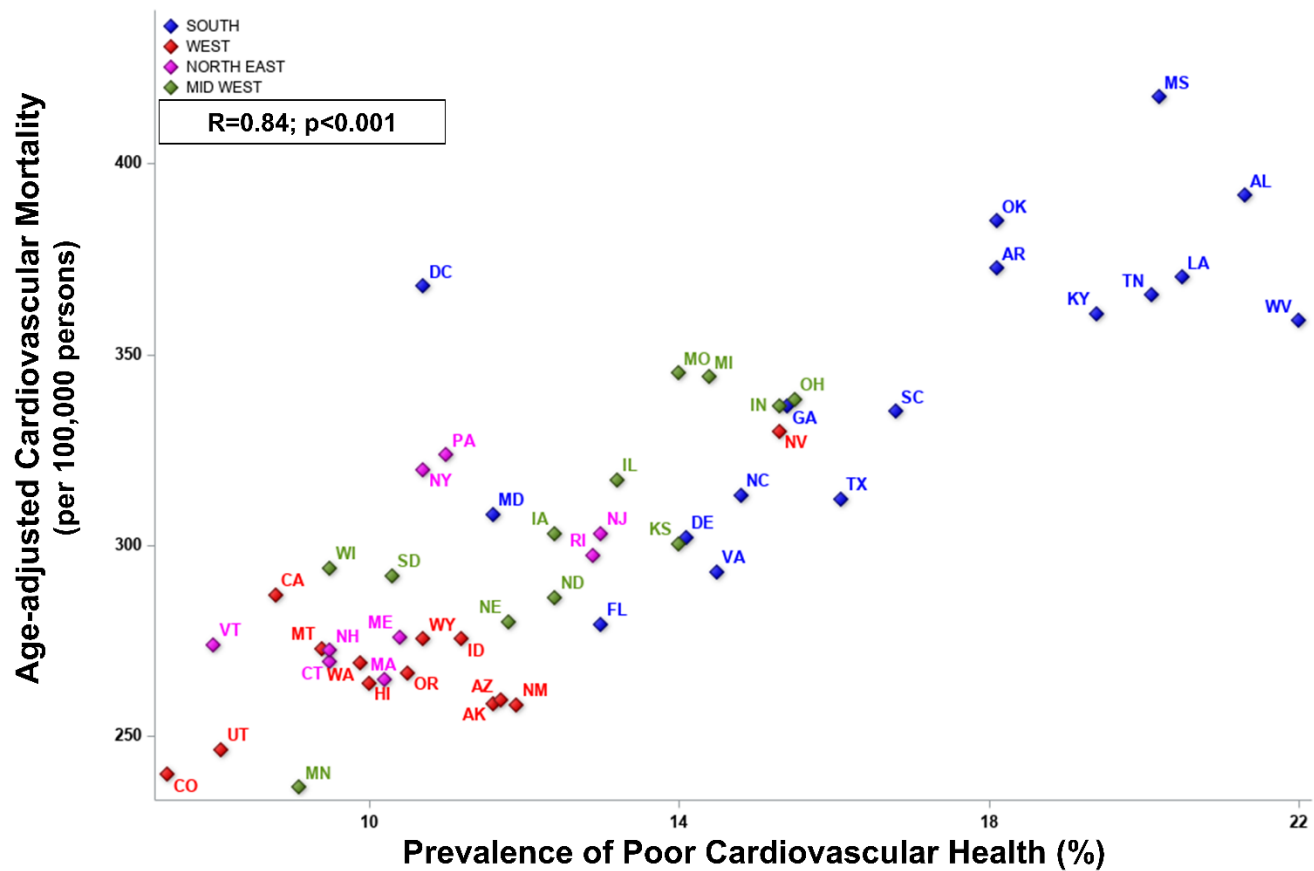

**Relationship of Cardiovascular Mortality and Prevalence of Poor Cardiovascular Health: Males**

**Supplementary Figure 13. Relationship of Cardiovascular Mortality and Prevalence of Poor Cardiovascular Health in Males**

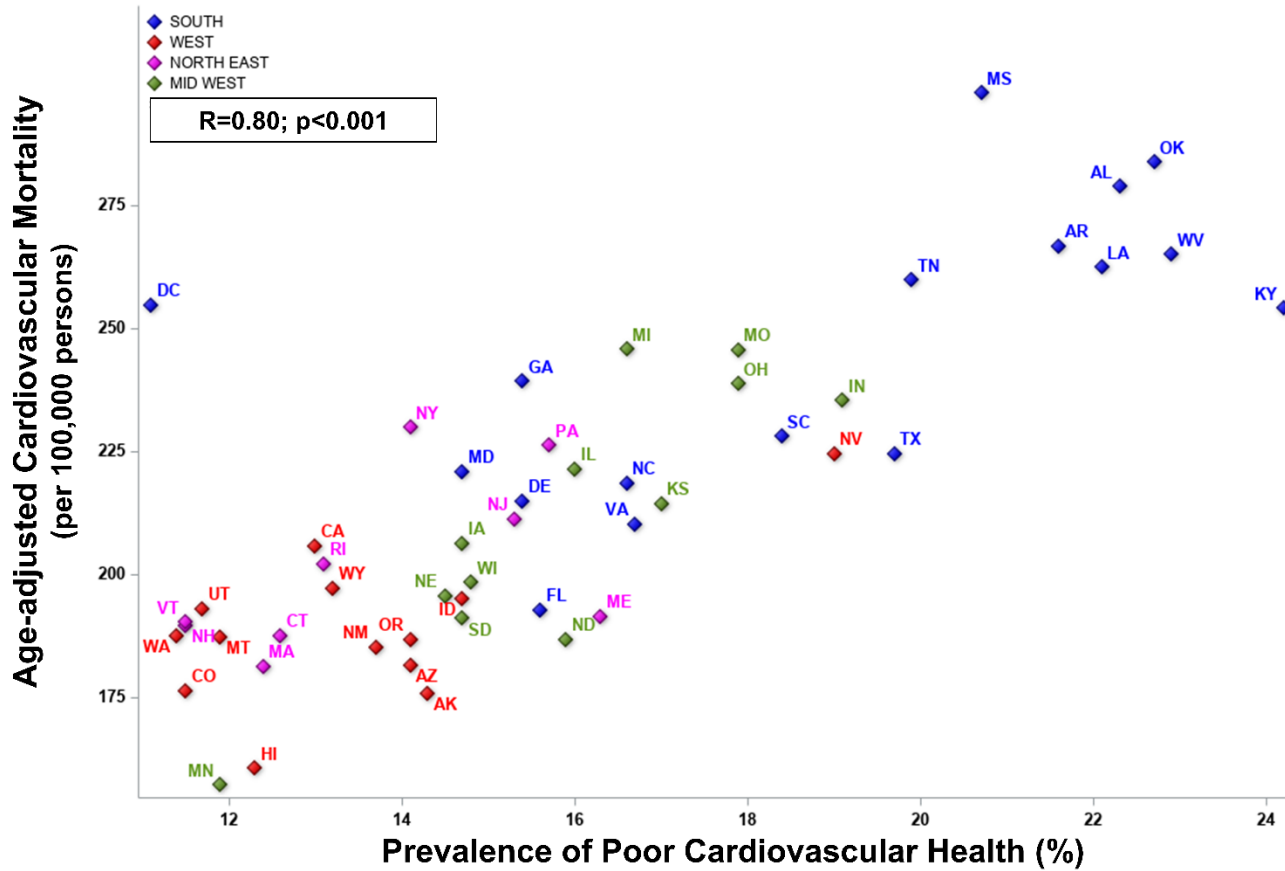

**Relationship of Cardiovascular Mortality and Prevalence of Poor Cardiovascular Health: Females**

**Supplementary Figure 14. Relationship of Cardiovascular Mortality and Prevalence of Poor Cardiovascular Health in**

**Females**

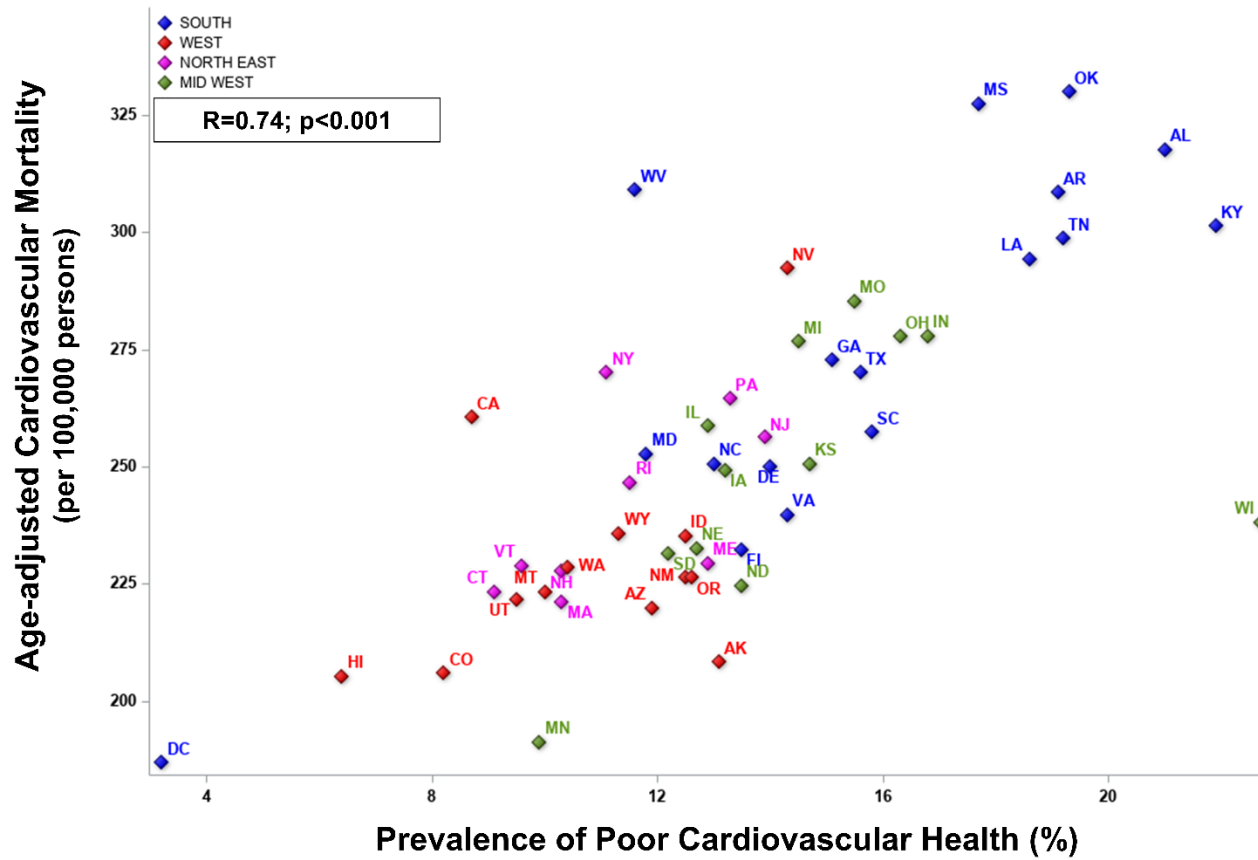

**Relationship of Cardiovascular Mortality and Prevalence of Poor Cardiovascular Health: Non-Hispanic Whites**

**Supplementary Figure 15. Relationship of Cardiovascular Mortality and Prevalence of Poor Cardiovascular Health in Non-Hispanic Whites**

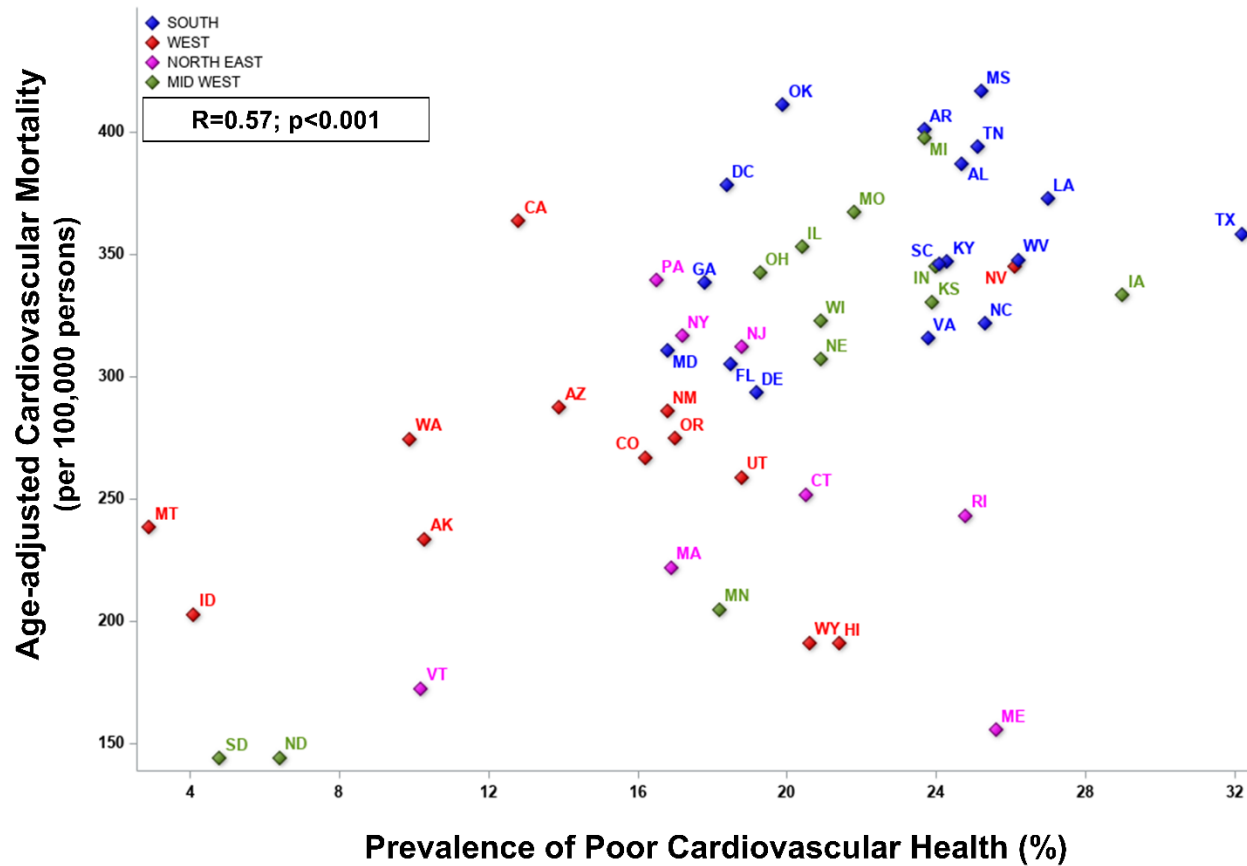

**Relationship of Cardiovascular Mortality and Prevalence of Poor Cardiovascular Health: Non-Hispanic Blacks**

**Supplementary Figure 16. Relationship of Cardiovascular Mortality and Prevalence of Poor Cardiovascular Health in Non-Hispanic Blacks**
